# Supplementary material
Source: PubMed Central journal article supplement (PMC6869954)
Supplement: HBM-33-2885-s001.pdf [file HBM-33-2885-s001.pdf]

## Supplementary Table S1

Psychological and physiological measures.

|                                                | Placebo        | Rapid CORT     | Slow CORT      |
|------------------------------------------------|----------------|----------------|----------------|
| <b>Affective State (PANAS)</b>                 |                |                |                |
| Positive affect: baseline                      | 30.78 (1.54)   | 32.39 (1.28)   | 32.11 (1.65)   |
| Positive affect: prior to encoding             | 29.28 (1.40)   | 30.67 (1.01)   | 31.50 (1.32)   |
| Positive affect: after encoding                | 26.00 (1.30)   | 25.22 (1.24)   | 28.00 (1.49)   |
| Negative affect: baseline                      | 16.06 (1.97)   | 13.06 (1.23)   | 14.50 (1.51)   |
| Negative affect: prior to encoding             | 16.17 (1.78)   | 14.78 (1.51)   | 15.17 (1.53)   |
| Negative affect: after encoding                | 16.11 (1.83)   | 15.22 (1.65)   | 15.22 (1.54)   |
| <b>Heart rate (BPM)</b>                        | 62.00 (1.77)   | 59.58 (1.41)   | 61.96 (1.24)   |
| <b>Heart rate variability (ms<sup>2</sup>)</b> | 134.71 (20.08) | 123.39 (16.85) | 109.70 (11.58) |
| <b>Picture rating (# congruent)</b>            |                |                |                |
| Neutral pictures                               | 77.67 (0.44)   | 77.17 (0.42)   | 78.06 (0.41)   |
| Negative pictures                              | 73.39 (0.98)   | 75.28 (0.64)   | 74.89 (1.02)   |
| <b>Memory performance</b>                      |                |                |                |
| Free recall: # neutral pictures                | 15.11 (2.11)   | 15.06 (2.66)   | 15.44 (1.88)   |
| Free recall: # negative pictures               | 29.22 (2.19)   | 29.17 (2.36)   | 31.67 (1.75)   |
| Cued recall: # neutral pictures                | 33.89 (3.27)   | 34.61 (3.51)   | 35.67 (2.86)   |
| Cued recall: # negative pictures               | 42.72 (2.37)   | 40.39 (3.27)   | 42.67 (2.30)   |

Mean values (S.E.M.). PANAS; Positive and Negative Affect Schedule questionnaire (Watson et al. 1988).

## Supplementary Table S2

Regions revealing main effects or interactions of picture valence and subsequent memory.

| Region                                                                | MNI Coordinates                     |     |     | Peak<br>T-score | Cluster-<br>size | P-value |             |
|-----------------------------------------------------------------------|-------------------------------------|-----|-----|-----------------|------------------|---------|-------------|
|                                                                       | Brodmann<br>area                    | x   | y   |                 |                  |         | z           |
| <b>Main effect of subsequent memory</b>                               |                                     |     |     |                 |                  |         |             |
| <i>Remembered &gt; Forgotten</i>                                      |                                     |     |     |                 |                  |         |             |
| Middle occipital gyrus, L & R                                         | <b>7,19</b>                         | 32  | -72 | 38              | 5.93             | 746     | $P < 0.001$ |
| Inferior temporal gyrus, L                                            | <b>19,37</b>                        | -52 | -58 | -10             | 7.78             | 988     | $P < 0.001$ |
| Inferior temporal gyrus, R                                            | <b>37</b>                           | 54  | -52 | -14             | 5.00             | 430     | $P < 0.001$ |
| Inferior parietal lobule, L                                           | <b>2,40</b>                         | -48 | -40 | 50              | 6.28             | 1479    | $P < 0.001$ |
| Hippocampus / Amygdala, L                                             | <b>34,35</b>                        | -14 | -8  | -12             | 5.95             | 623     | $P < 0.001$ |
| Superior temporal pole / Amygdala, R                                  | <b>34,36,38</b>                     | 30  | 8   | -22             | 4.64             | 187     | $P = 0.041$ |
| Middle cingulate gyrus                                                | <b>24</b>                           | 2   | -2  | 36              | 4.70             | 240     | $P = 0.015$ |
| Inferior & Middle frontal gyrus, L                                    | <b>6,44,48</b>                      | -50 | 10  | 26              | 6.81             | 1698    | $P < 0.001$ |
| Inferior frontal gyrus, R                                             | <b>44</b>                           | 50  | 10  | 24              | 5.36             | 263     | $P = 0.010$ |
| Supplemental motor area, L                                            | <b>6</b>                            | -6  | 10  | 62              | 5.34             | 191     | $P = 0.038$ |
| Superior frontal gyrus, L                                             | <b>9</b>                            | -20 | 32  | 48              | 5.20             | 299     | $P = 0.005$ |
| Inferior frontal & Orbitofrontal gyrus, L                             | <b>45</b>                           | -46 | 40  | 14              | 5.28             | 789     | $P < 0.001$ |
| <i>Forgotten &gt; Remembered</i>                                      |                                     |     |     |                 |                  |         |             |
| Precuneus                                                             | <b>7,23,26</b>                      | 4   | -64 | 36              | 6.63             | 2279    | $P < 0.001$ |
| Middle temporal gyrus, R                                              | <b>20-22,37</b>                     | 56  | -48 | 16              | 5.63             | 672     | $P < 0.001$ |
| Middle frontal gyrus, R                                               | <b>10,11,46</b>                     | 36  | 48  | 14              | 4.28             | 467     | $P < 0.001$ |
| <b>Main effect of picture valence</b>                                 |                                     |     |     |                 |                  |         |             |
| <i>Aversive &gt; Neutral</i>                                          |                                     |     |     |                 |                  |         |             |
| Cerebellum, L                                                         | /                                   | -14 | -74 | -44             | 9.15             | 949     | $P < 0.001$ |
| Middle temporal gyrus, L                                              | <b>19-21,37,39</b>                  | -50 | -64 | 8               | 15.97            | 5821    | $P < 0.001$ |
| Middle temporal gyrus, R<br>(incl. hippocampus, amygdala, and insula) | <b>19-22,28,34,<br/>37,41,42,48</b> | 54  | -66 | 0               | 16.79            | 15089   | $P < 0.001$ |
| Precuneus / Posterior cingulate cortex                                | <b>23,26</b>                        | 4   | -54 | 30              | 9.44             | 1310    | $P < 0.001$ |
| Inferior frontal gyrus, L & R                                         | <b>45</b>                           | -48 | 32  | 4               | 5.16             | 303     | $P = 0.005$ |
| Superior medial frontal gyrus                                         | <b>8-10,32</b>                      | 6   | 52  | 32              | 8.97             | 1821    | $P < 0.001$ |
| Rectal gyrus                                                          | <b>11</b>                           | 4   | 56  | -16             | 7.54             | 420     | $P < 0.001$ |
| <i>Neutral &gt; Aversive</i>                                          |                                     |     |     |                 |                  |         |             |
| Cerebellum, L                                                         | /                                   | -40 | -62 | -44             | 5.37             | 236     | $P = 0.016$ |
| Calcarine, L & R                                                      | <b>17-19,23,27,</b>                 | -16 | -58 | 14              | 9.40             | 2069    | $P < 0.001$ |

|                                              |                          |     |     |     |      |      |             |
|----------------------------------------------|--------------------------|-----|-----|-----|------|------|-------------|
|                                              | <b>29,30,37</b>          |     |     |     |      |      |             |
| Inferior parietal lobule, L                  | <b>7,39,40</b>           | -48 | -54 | 48  | 6.76 | 637  | $P < 0.001$ |
| Inferior parietal lobule, R                  | <b>7,39,40</b>           | 50  | -48 | 48  | 8.36 | 1017 | $P < 0.001$ |
| Inferior temporal gyrus, L & R               | <b>20-22,37,48</b>       | 62  | -40 | -14 | 8.46 | 2595 | $P < 0.001$ |
| Fusiform, L & R                              | <b>17,19,23,27,30,37</b> | 28  | -44 | -10 | 9.37 | 1787 | $P < 0.001$ |
|                                              | <b>30,37</b>             |     |     |     |      |      |             |
| Superior temporal gyrus, L & R               | <b>20-22,43,48</b>       | -58 | -4  | 4   | 7.25 | 2798 | $P < 0.001$ |
| Middle frontal gyrus, L & R                  | <b>8-11,45,46</b>        | 42  | 36  | 28  | 8.29 | 7901 | $P < 0.001$ |
| <b>Valence by SME interaction (positive)</b> |                          |     |     |     |      |      |             |
| Orbitofrontal cortex, L                      | <b>38</b>                | -34 | 20  | -18 | 4.39 | 210  | $P = 0.026$ |
| Medial superior frontal gyrus                | <b>10,11,32</b>          | 0   | 66  | 20  | 5.28 | 1141 | $P < 0.001$ |

---

The peak x, y, z coordinates are given in MNI152 standard space coordinates. L and R denote left and right. SME: subsequent memory effect. All effects were analyzed using whole brain family wise error (FWE) correction for multiple comparisons at the cluster-level ( $P_{fwe} < 0.05$ ), after using a height threshold of  $P < 0.001$ .

### Supplementary Table S3

Regions revealing significant slow CORT effects, after correcting for the difference in cortisol level between placebo and slow CORT during scanning.

| Region                        | Brodmann area  | MNI Coordinates |    |    | Peak T-score | Cluster size     | P-value       |
|-------------------------------|----------------|-----------------|----|----|--------------|------------------|---------------|
|                               |                | x               | y  | z  |              |                  |               |
| <b>Placebo &gt; Slow CORT</b> |                |                 |    |    |              |                  |               |
| Middle frontal gyrus, R       | <b>9,46,48</b> | 24              | 36 | 30 | 4.48         | 717***           | $P < 0.001^*$ |
| Middle frontal gyrus, L       | <b>9,46,48</b> | -24             | 34 | 28 | 4.42         | 165 <sup>+</sup> | $P = 0.025^+$ |
| Sup orbitofrontal lobule, L   | <b>11</b>      | -24             | 52 | -2 | 3.82         | 155 <sup>+</sup> | $P = 0.030^+$ |

The peak x, y, z coordinates are given in MNI152 standard space coordinates. L and R denote left and right. All effects were analyzed using family wise error (FWE) correction for multiple comparisons at the cluster-level ( $P_{fwe} < 0.05$ ), after using a height threshold of  $P < 0.001$ . \*: FWE-corrected for whole brain volume, <sup>+</sup>: FWE-corrected for region of interest

## Supplementary Figure S1

Day 1: Intake

t = 0 Screening Questionnaire  
t = 30 Personality Questionnaires  
t = 60 Structural scan

|                                                                                                   |
|---------------------------------------------------------------------------------------------------|
| Day n:                                                                                            |
| t = 0 Arrival; explanation procedure                                                              |
| t = 30 Saliva sample 1<br>Mood Questionnaire 1                                                    |
| t = 45 Saliva sample 2<br>Drug 1                                                                  |
| t = 75 Saliva sample 3                                                                            |
| t = 105 Saliva sample 4                                                                           |
| t = 135 Saliva sample 5                                                                           |
| t = 195 Saliva sample 6<br>Drug 2                                                                 |
| t = 225 Entering MRI scanner<br>Saliva sample 7<br>Mood Questionnaire 2<br>Start Picture Encoding |
| t = 285 End Picture Encoding<br>Saliva sample 8<br>Mood Questionnaire 3                           |
| Day n+1:                                                                                          |
| t = 0 Arrival; explanation procedure                                                              |
| t = 15 Free Recall Memory Test                                                                    |
| t = 75 Cued Recall Memory Test                                                                    |
| t = 135 End of session                                                                            |

**x 3:**  
**different drug manipulations  
& different picture sets**

**Fig. S1** Time line of the experiment. Participants were first invited for an intake interview, after which they returned for three sessions consisting of two subsequent days and separated by approximately a month. t = time in minutes

## Supplementary Figure S2

### Statistical analysis: Design

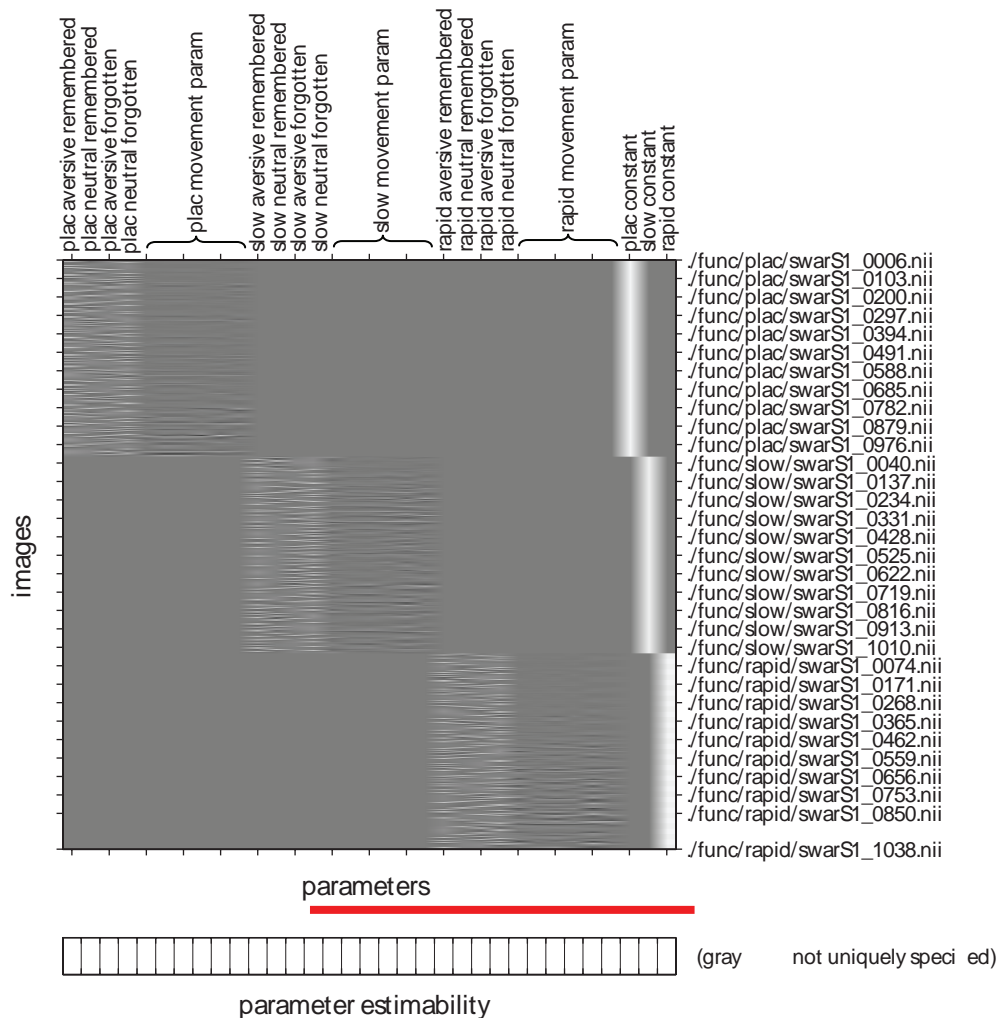

#### Design description...

**Basis functions:** hrf  
**Number of sessions:** 3  
**Trials per session:** 4 4 4  
**Interscan interval:** 2.34 [s]  
**High pass Filter:** Auto : 128 [s]  
**Global calculation:** mean voxel value  
**Grand mean scaling:** session specific  
**Global normalisation:** Scaling

**Fig. S2** Exemplary design matrix for the first model used in fMRI data analysis. All individual events were modeled based on drug condition (slow CORT vs. rapid CORT vs. placebo), subsequent memory (remembered vs. forgotten), and item aversiveness (aversive vs. neutral). Besides these regressors the six covariates corresponding to the movement for every session were included in the model, as well as a constant.

### Supplementary Figure S3

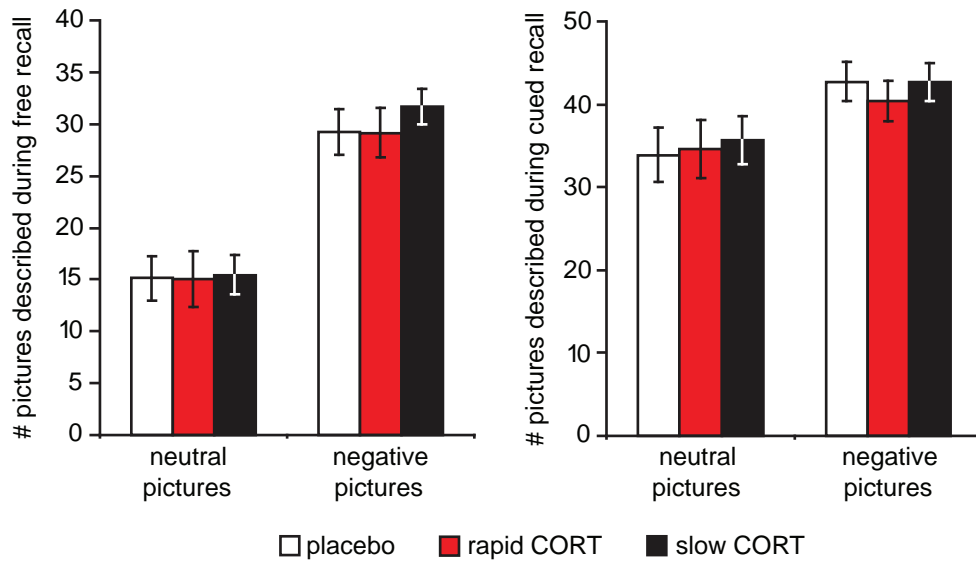

**Fig. S3** Number of pictures recalled in the free and cued recall tests. CORT; hydrocortisone

### Supplementary Figure S4

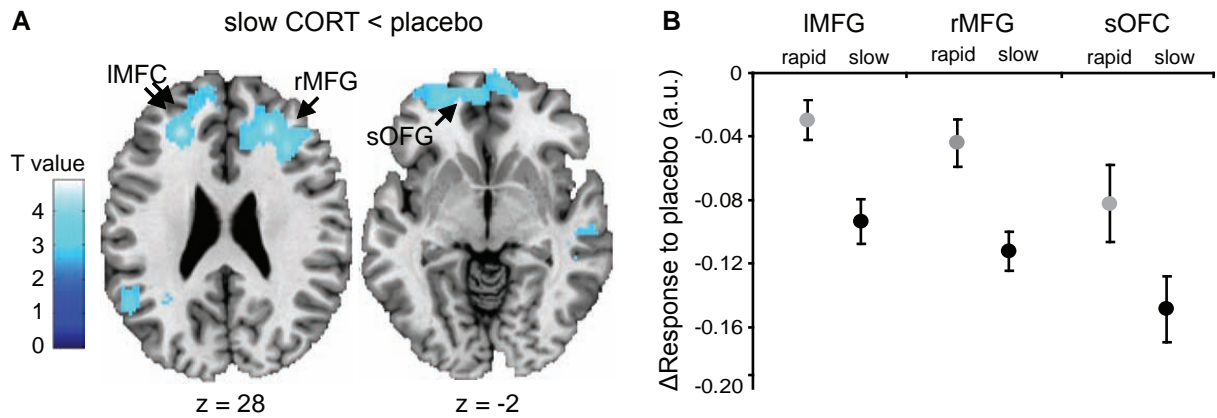

**Fig. S4** Brain regions displaying decreased activity compared to placebo due to the slow effects of hydrocortisone (CORT). To correct for the residual elevation in salivary cortisol levels still present during scanning, the absolute difference was entered as a covariate in the general linear model. **A**, This did not change the results: activity in middle prefrontal gyrus (MFG) and orbitofrontal cortex (OFC) was strongly reduced in the slow CORT condition. **B**, parameter estimates of the observed activation clusters in Fig S4A revealed significant downregulation due to the slow effects of corticosteroids.
